# Supplementary material
Source: MDPI journal article supplement (https://www.mdpi.com/2077-0472/8/11/171)
Supplement: s1 [file s1]

Supplementary materials (O'Toole et al. 2018)

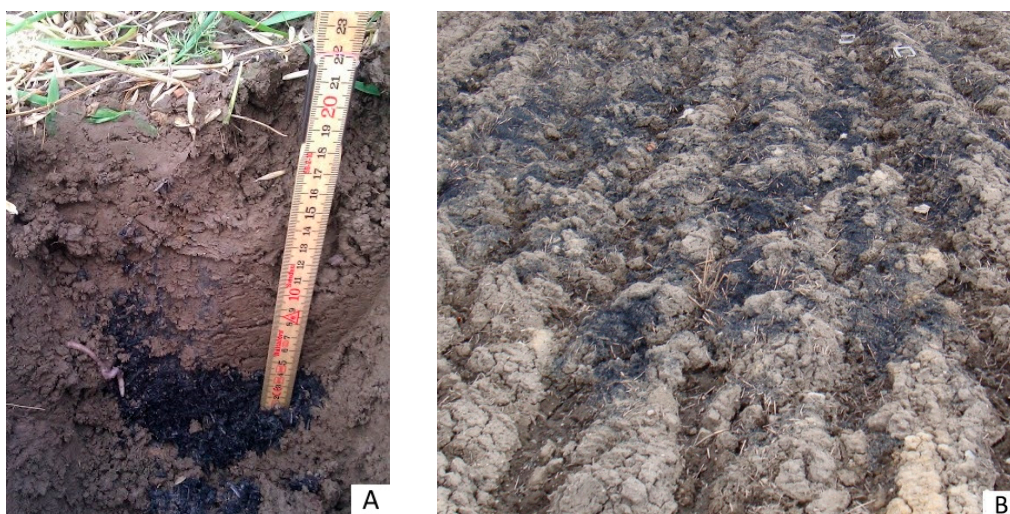

**Fig. S1:** (A) Concentrated seams of biochar due to inverse ploughing of surface applied biochar (photo taken June, 2011), and (B) resurfacing of biochar with ploughing in the opposite driving direction (April 2012).

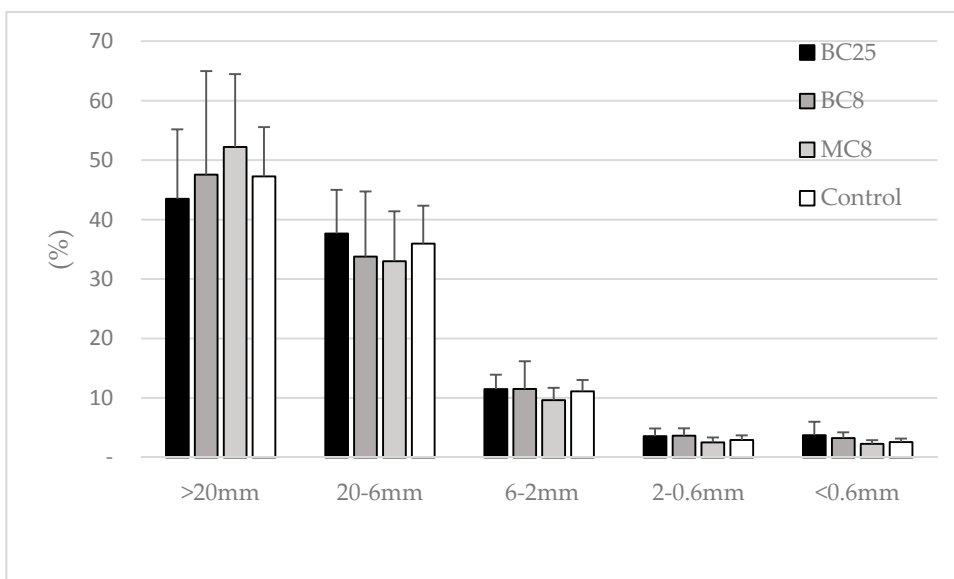

**Fig. S2.** Aggregate size distribution after machine dry sieving. Error bars indicate  $\pm$  SD (n=4)

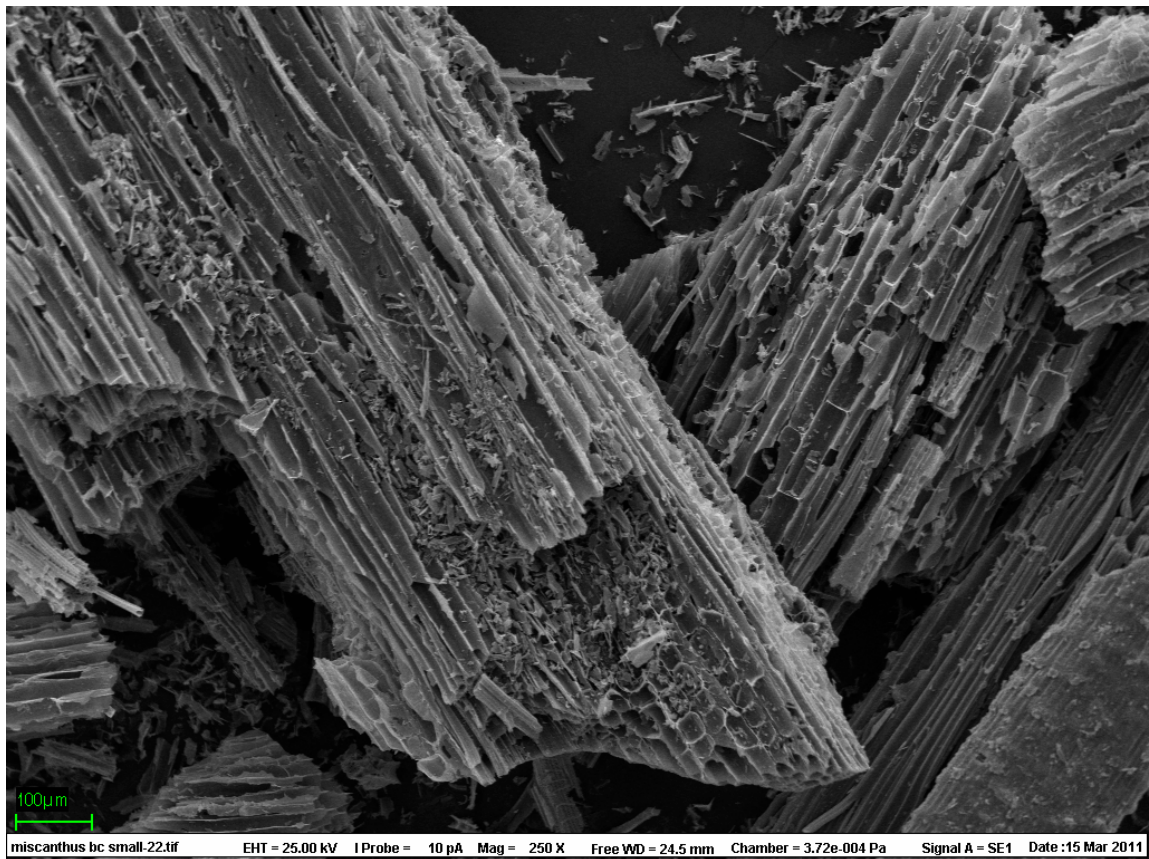

Fig.S3 SEM images of fresh *Miscanthus* biochar showing the porous surface and irregular shape

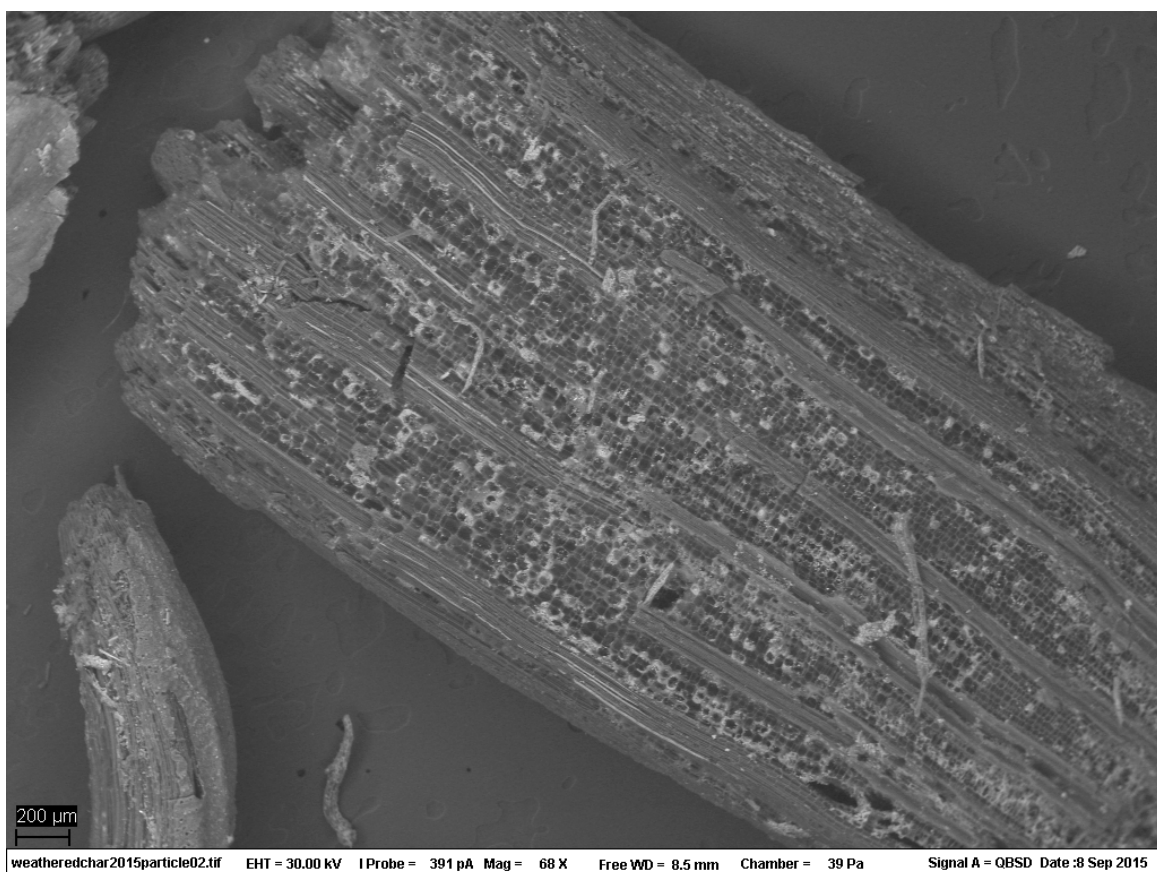



**Fig.S4.** SEM image of weathered *Miscanthus* biochar collected after 5 years of field incubation. Evidence of partial clogging of surface micropores with soil particles.

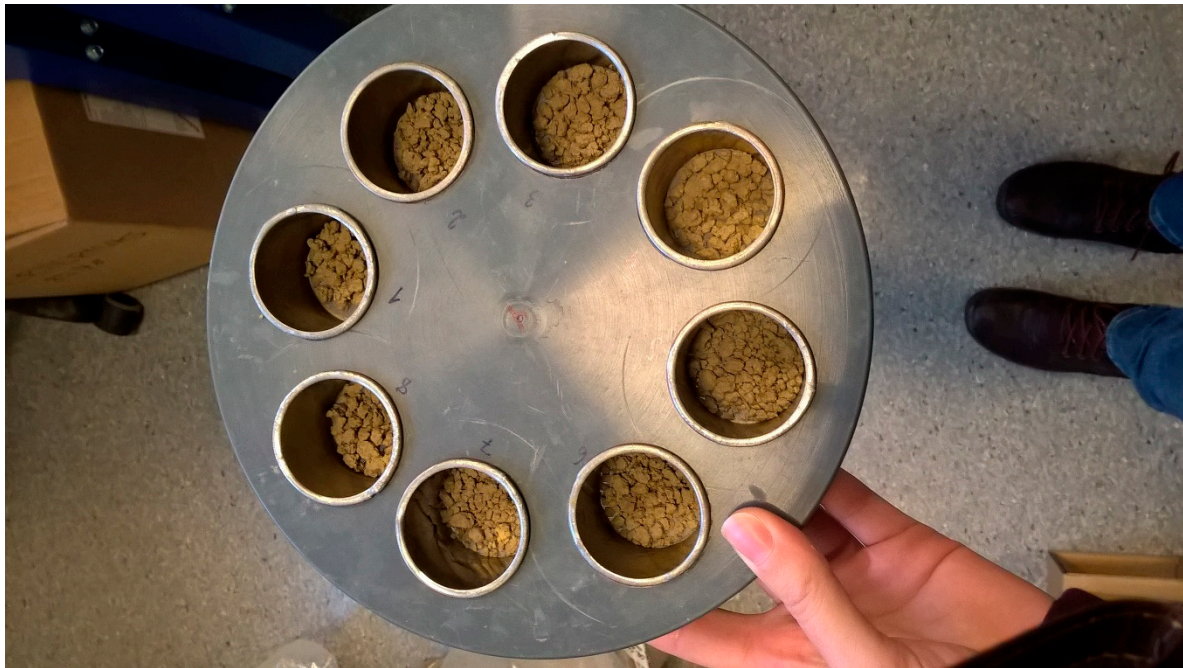

**Fig. S5.** Approximately 15 g of 2-6mm sized aggregates placed in small sieves prior to pre-wetting and wet sieving. Some of the aggregates were later found to be large biochar particles encrusted in thin films of clay.

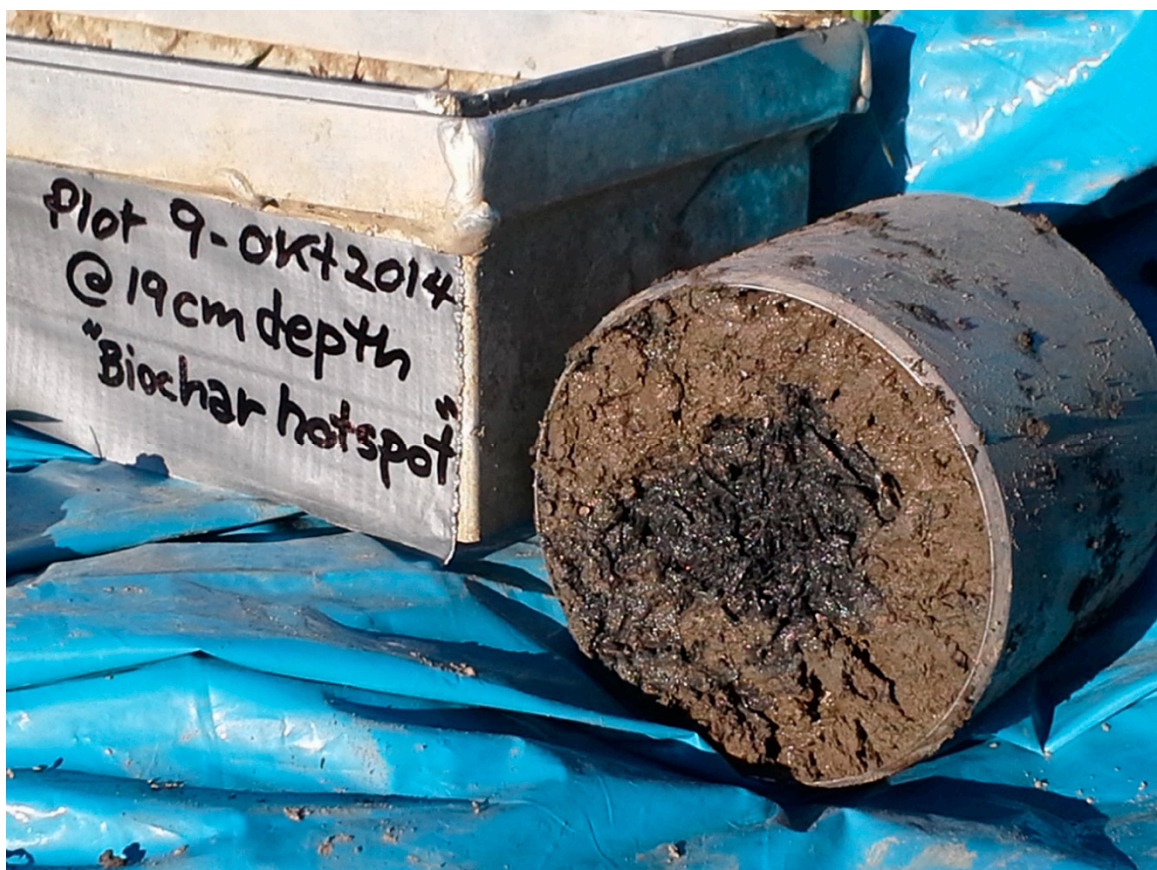

**Fig. S6.** Illustrative evidence of “Biochar patchiness” from field samples. This sample is from 4 years after biochar addition and is the same sample used for the retention curve in Fig. 9a.

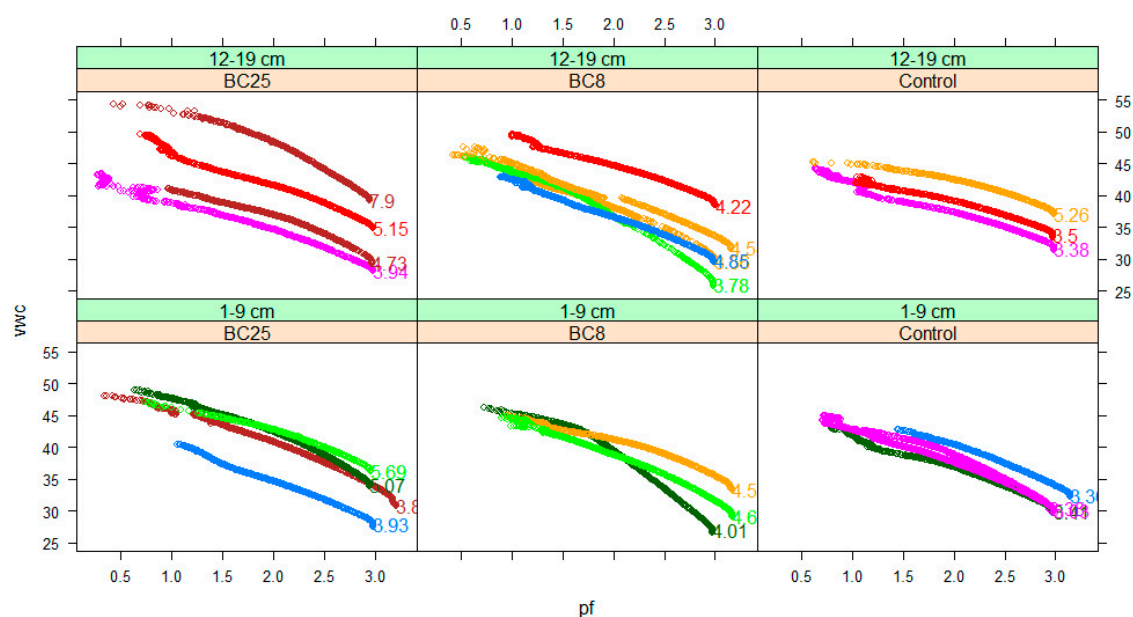

**Fig.S7.** Water retention curves for each intact soil core in each treatment and depth, with corresponding SOM content for each soil core

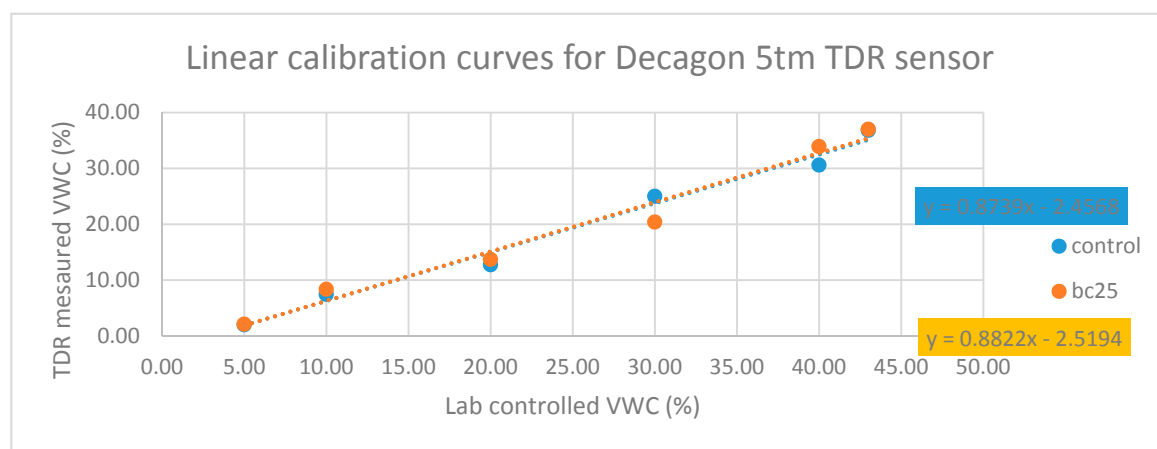

**Fig.S8.** Linear calibration curves for Decagon 5TM TDR sensor used for field based soil water content measurements. Calibration is presented only for BC25 and control. BC8 and MC8 calibration were not different from the control, and thus control calibrations were used for BC8 and MC8.

**Table S1.** Mean air temperature (°C) and monthly precipitation (mm) in Ås, Norway for four growing seasons (2011-14) compared with normal (1961-1990) monthly averages

| Month | Mean daily air temperature (°C) |      |      |      |      | Total precipitation (mm) |      |      |      |      |
|-------|---------------------------------|------|------|------|------|--------------------------|------|------|------|------|
|       | Normal<br>(1961-1990)           | 2011 | 2012 | 2013 | 2014 | Normal<br>(1961-1990)    | 2011 | 2012 | 2013 | 2014 |
| April | 4                               | 8    | 4    | 3    | 7    | 39                       | 41   | 31   | 57   | 62   |
| May   | 10                              | 10   | 11   | 12   | 11   | 60                       | 63   | 14   | 64   | 40   |

|       |    |    |    |    |    |    |     |     |     |     |
|-------|----|----|----|----|----|----|-----|-----|-----|-----|
| June  | 15 | 15 | 13 | 14 | 15 | 68 | 136 | 84  | 112 | 25  |
| July  | 16 | 17 | 16 | 17 | 20 | 81 | 89  | 110 | 12  | 46  |
| Aug.  | 15 | 15 | 15 | 16 | 15 | 83 | 175 | 83  | 57  | 123 |
| Sept. | 11 | 12 | 10 | 11 | 12 | 90 | 158 | 83  | 57  | 31  |

**Table S2:** Classes of stability and crustability according to MWD values (reprinted with permission from Le Bissonnais (1996))

| Class | MWD (mm) | Stability     | Crustability               |
|-------|----------|---------------|----------------------------|
| 1     | <0.4     | Very unstable | Systematic crust formation |
| 2     | 0.4-0.8  | Unstable      | Crusting frequent          |
| 3     | 0.8-1.3  | Medium        | Crusting moderate          |
| 4     | 1.3-2.0  | Stable        | Crusting rare              |
| 5     | >2.0     | Very Stable   | No crusting                |

**Table. S3** Maximum limit for heavy metals for soil improvement materials from organic origin (according to Norwegian law 'Gjødselvereforskriften' (Mattilsynet, 2003) and actual values for Miscanthus biochar used in field trial

| Quality class                | 0   | 1   | 2   | 3    | Miscanthus<br>biochar |
|------------------------------|-----|-----|-----|------|-----------------------|
| <i>mg kg<sup>-1</sup> DM</i> |     |     |     |      |                       |
| Cd                           | 0,4 | 0.8 | 2   | 5    | <0.01                 |
| Pb                           | 40  | 60  | 80  | 200  | <0.31                 |
| Hg                           | 0.2 | 0.6 | 3   | 5    | <0.01                 |
| Ni                           | 20  | 30  | 50  | 80   | 2.50                  |
| Zn                           | 150 | 400 | 800 | 1500 | 39.00                 |
| Cu                           | 50  | 150 | 650 | 1000 | 4.60                  |
| Cr                           | 50  | 60  | 100 | 150  | 1.50                  |
